# Supplementary material
Source: publisher figshare collection journal article supplement (https://karger.figshare.com/articles/dataset/_/5123671)
Supplement: Supplementary file 1 [file 1]

## Supplementary figure 1: Tréguer et al.

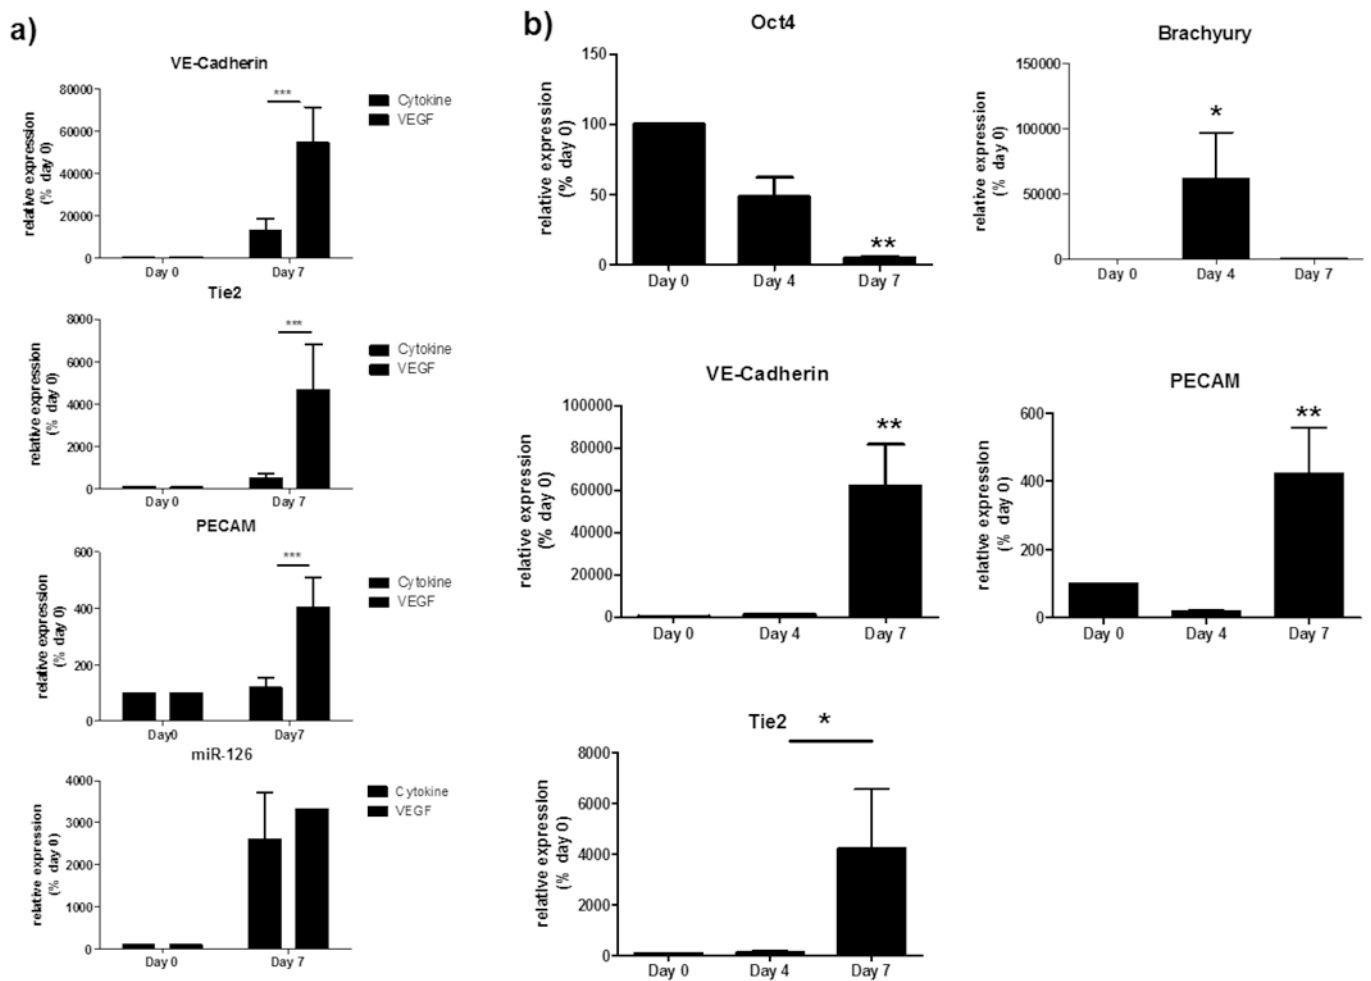

### Supplementary Figure 1: Comparison of the two differentiation protocols.

a) The expression of the endothelial markers after differentiation in either the cytokine medium or the VEGF medium is depicted as percentage of Day 0  $\pm$  SEM. b) The cells were differentiated for 7 days in the absence of LIF and the presence of VEGF. The data are normalized against  $\beta$ -actin (Oct4, Brachyury, VE-Cadherin) or PolR2A (PECAM, Tie2), and are depicted as mean % Day 0  $\pm$  SEM. N= 3-4. \*P<0.05, \*\*P<0.01, \*\*\*P<0.001.
