# Supplementary material
Source: publisher figshare collection journal article supplement (https://karger.figshare.com/articles/dataset/_/5123671)
Supplement: Supplementary file 2 [file 1]

## Supplementary table 1: Tréguer et al.

| Target gene                           |            | Sequence (5'-3')                |
|---------------------------------------|------------|---------------------------------|
| Mouse <u><math>\beta</math>-actin</u> | For        | ACGCCAGGTCATCACTATTG            |
|                                       | Rev        | CCAAGAAGGAAGGCTGGAAAA           |
| Oct4 (Pou5f1)                         | For        | AAGTGCCCGAAGCCCTCCCT            |
|                                       | Rev        | GCCCTTCTGGCGCCGGTTAC            |
| Brachyury                             | For        | GCTTCAAGGAGCTAACTAACGAG         |
|                                       | Rev        | CCAGCAAGAAAGAGTACATGGC          |
| VE-Cadherin                           | For        | AGCGCAGCATCGGGTACT              |
|                                       | Rev        | TCGGAAGAATTGGCCTCTGT            |
| <u>Runx1</u>                          | <u>For</u> | <u>GCAGAGCGGTGAAAGAAATTA</u>    |
|                                       | <u>Rev</u> | <u>TGAAGCACTGTGGATATGAAGG</u>   |
| <u>SMA</u>                            | <u>For</u> | <u>CTTCCAGCCATCTTTCATTGG</u>    |
|                                       | <u>Rev</u> | <u>TGATGCTGTTATAGGTGGTTTCGT</u> |

**Supplementary Table 1: Sigma Primers** (Sigma-Aldrich, Taufkirchen, Germany)  
 For the detection of Tal1 verified primers were used (Quantitect primer Assay, Qiagen).

Supplementary table 2: Tréguer et al.

| Taqman assay ID | Target Sequence (5'-3')                                                                                                                                                                                                                                                         |
|-----------------|---------------------------------------------------------------------------------------------------------------------------------------------------------------------------------------------------------------------------------------------------------------------------------|
| snRNA U6        | GUGCUCGCUUCGGCAGCACAUAUACUAAAAUUGGAACGAUACAGAG<br>AAGAUUAGCAUGGCCCCUGCGCAAGGAUGACACGCAAUUCGUGAA<br>GCGUUCCAUAUUUUUACUGCCCUCCAUGCCUGCCCCACAAACGCUC<br>UGAUAACAGUCUGUCCUGUCUCUCUCCUGCUGCUCCUAUGGAAGC<br>GAAGUUUCCCGUCCUGCAGAAAGCAAAGUUACGACUCAGAGACGG<br>CUGAGGAUGACAUCAGCGAUGUGC |
| Hsa-miR-17      | CAAAGUGCUUACAGUGCAGGUAG                                                                                                                                                                                                                                                         |
| Hsa-miR-18a     | UAAGGUGCAUCUAGUGCAGAUAG                                                                                                                                                                                                                                                         |
| Hsa-miR-19a     | UGUGCAAUCUAUGCAAACUGA                                                                                                                                                                                                                                                           |
| Hsa-miR-20a     | UAAAGUGCUUAUAGUGCAGGUAG                                                                                                                                                                                                                                                         |
| Hsa-miR-92a     | UAUUGCACUUGUCCCGGCCUGU                                                                                                                                                                                                                                                          |
| PECAM (CD31)    | Exon boundary 7-8                                                                                                                                                                                                                                                               |
| PolR2A          | Exon boundary 5-6                                                                                                                                                                                                                                                               |
| Tie2            | Exon boundary 13-14                                                                                                                                                                                                                                                             |

**Supplementary Table 2: Taqman Assays** (Applied Biosystems, Carlsbad, CA, USA)
